# Supplementary material
Source: publisher figshare collection journal article supplement (https://aacr.figshare.com/articles/dataset/_/22651575)
Supplement: Supplementary file 1 [file 40209228]

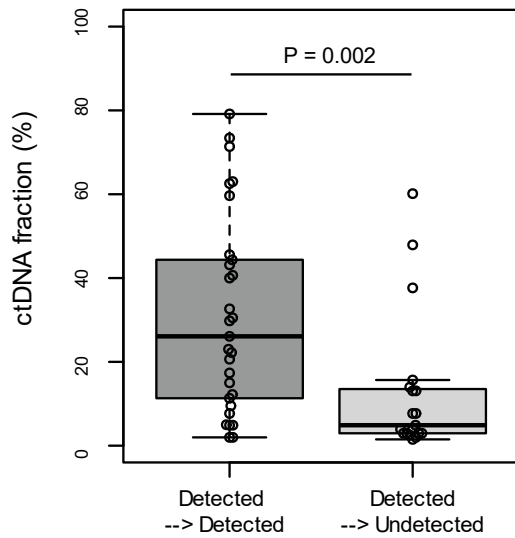

**Supplementary Figure S8.** Baseline circulating tumor DNA fraction according to detection status at 4 weeks. Box plot showing the difference in distribution of baseline ctDNA fraction in patients who have ctDNA detected at both baseline and 4 weeks compared to patients converting from detected to undetected ctDNA by 4 weeks.
